# Supplementary material for: Discovery of N-(Naphtho[1,2-b]Furan-5-Yl) Benzenesulfonamides as Novel Selective Inhibitors of Triple-Negative Breast Cancer (TNBC)
Source: MDPI journal article supplement (doi:10.3390/molecules23030678), 2018-03-16
Supplement: s1 [file s1]

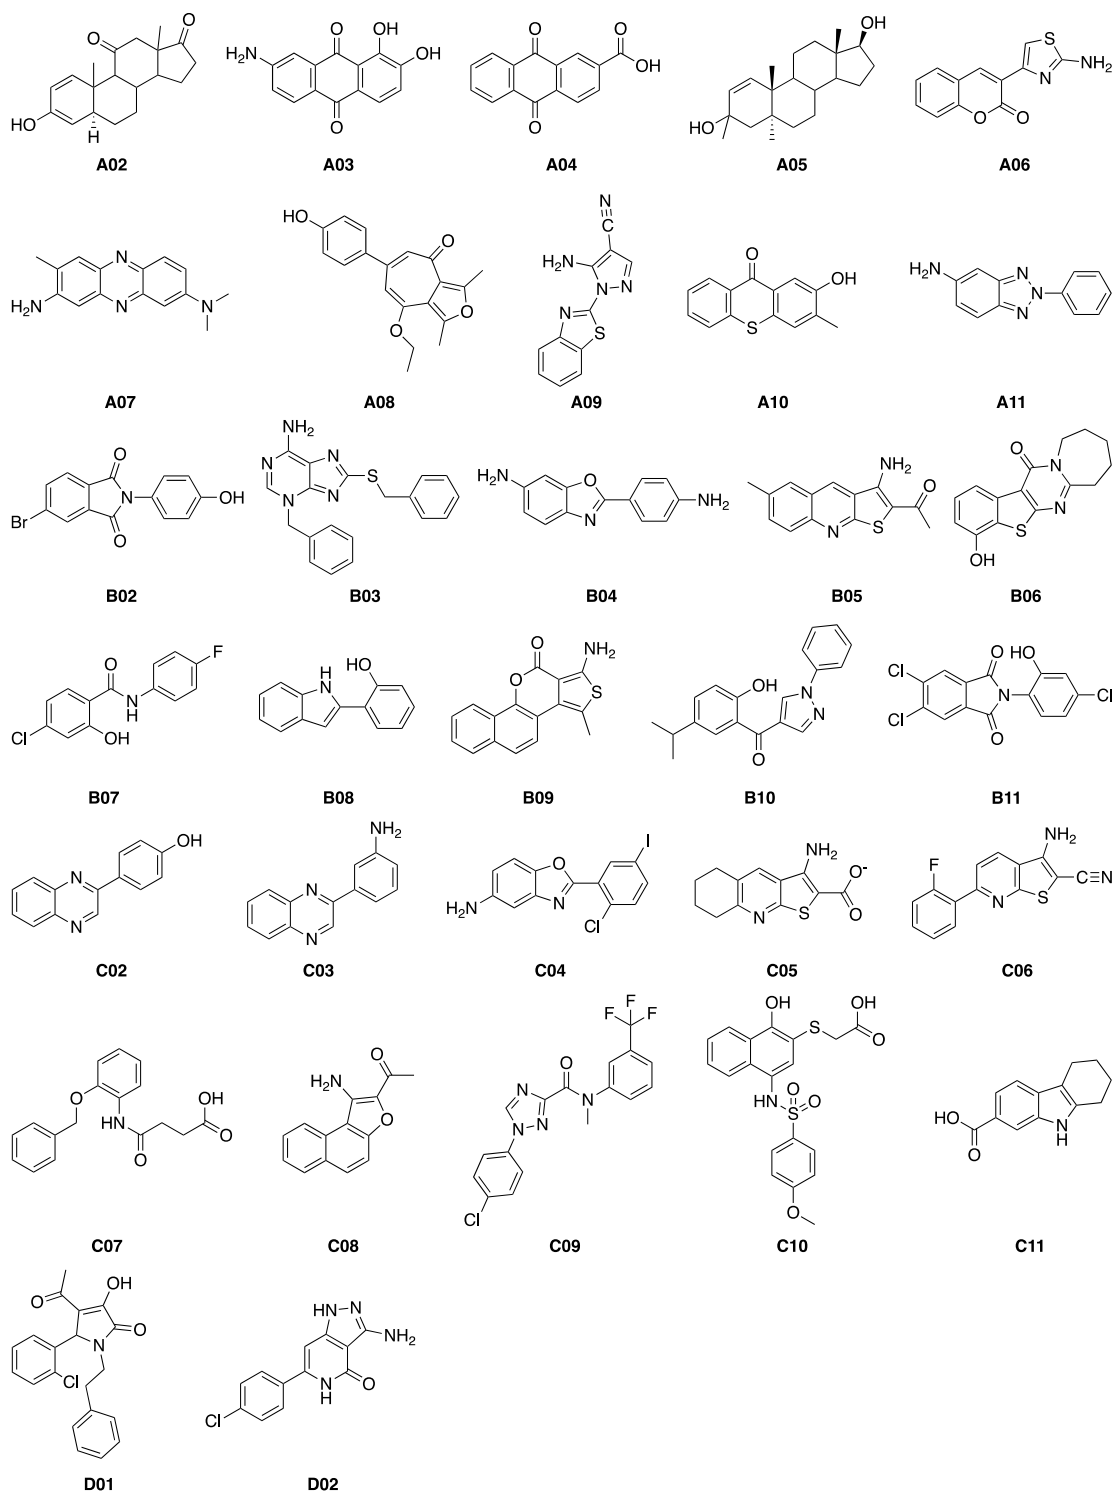

**Figure S1.** Structures of 32 compounds from 3D similarity search.

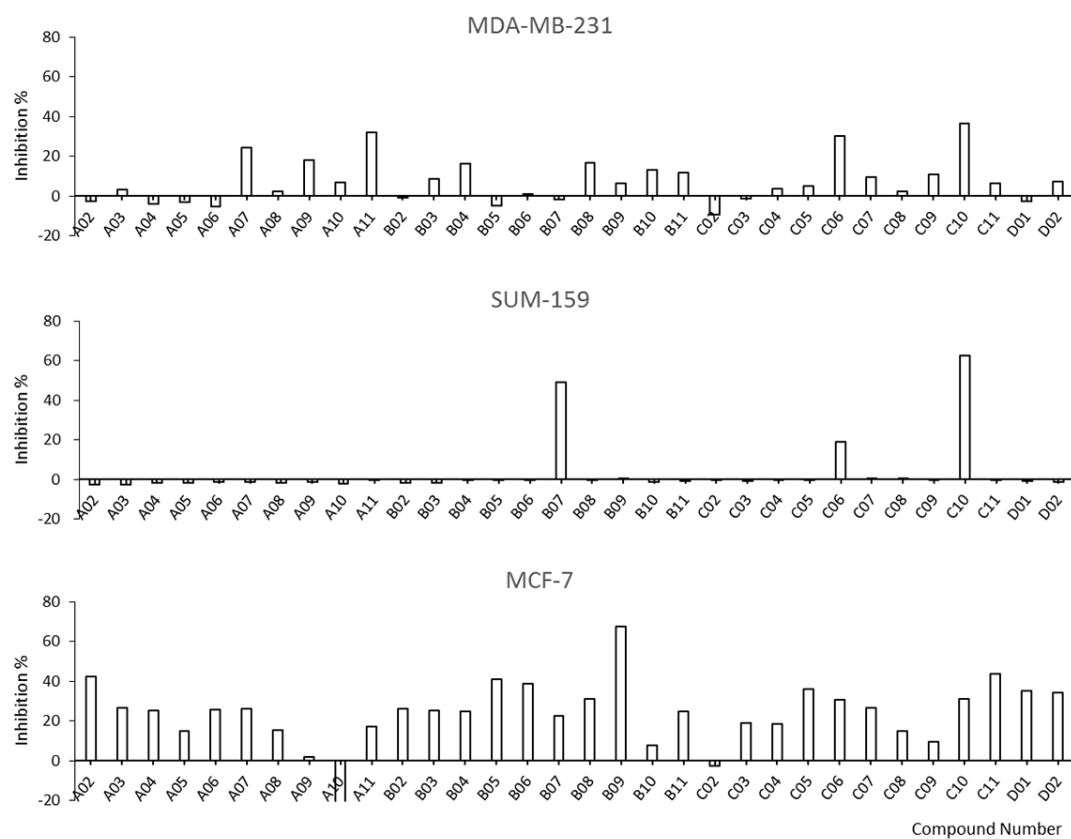

**Figure S2.** Inhibition rates of 32 compounds at 10  $\mu$ M from 3D similarity search.

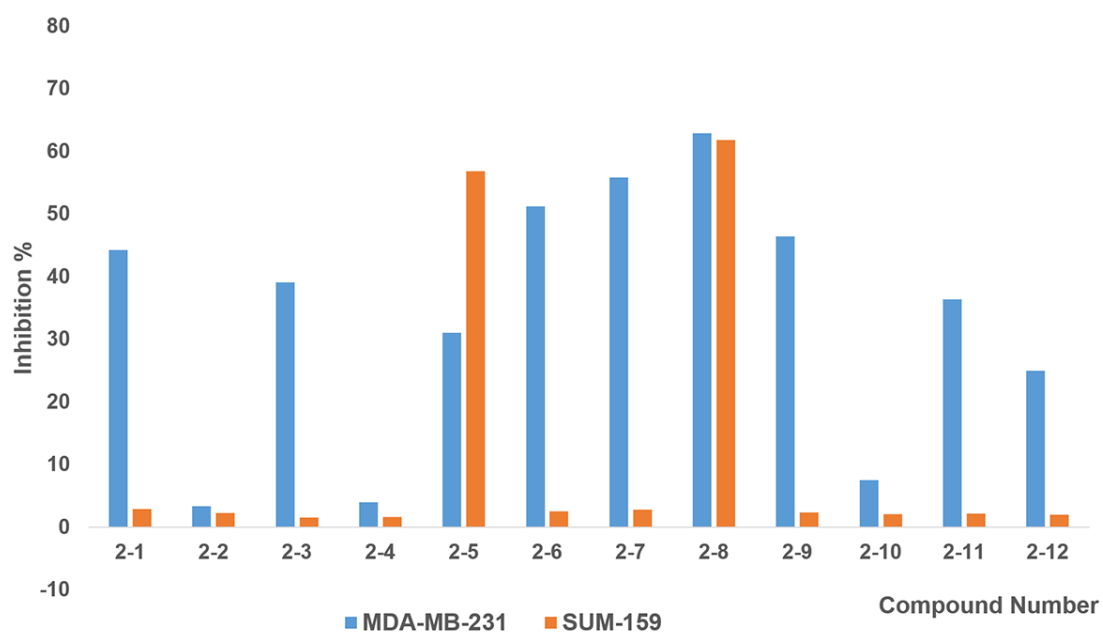

**Figure S3.** Inhibition rates of 12 compounds at 5 µg/ml from C10 2D similarity search.

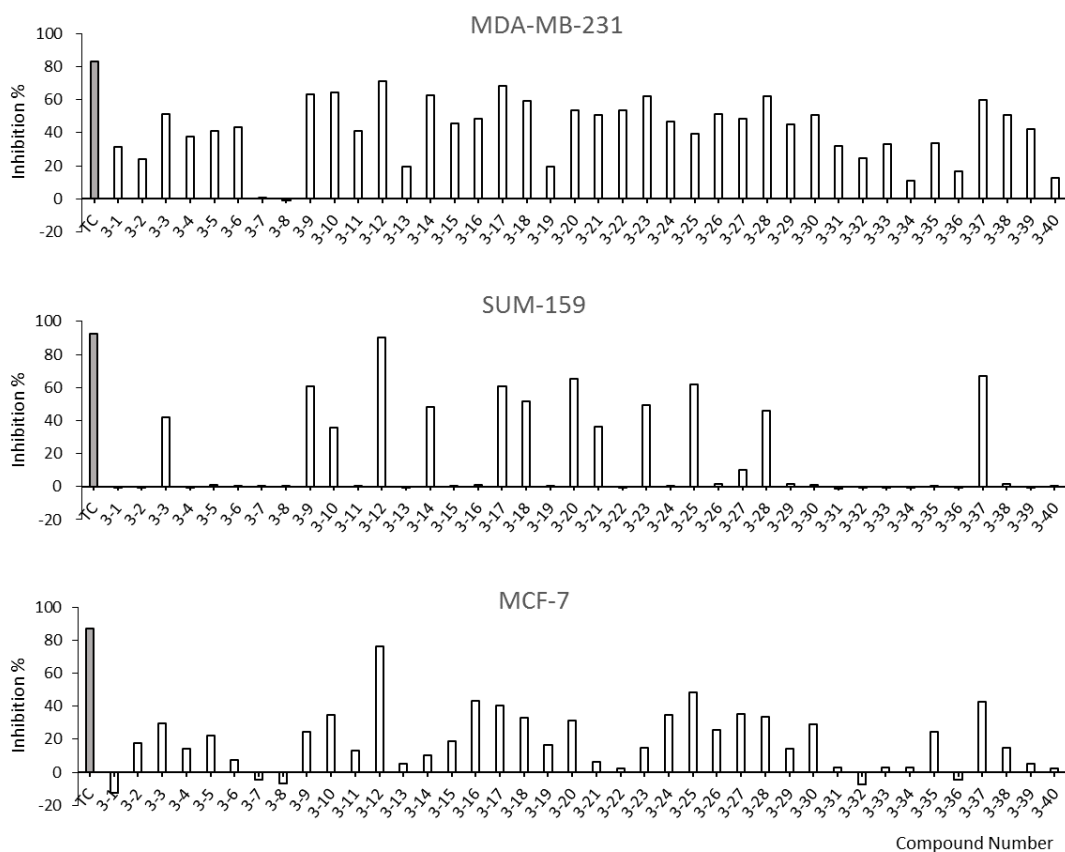

**Figure S4.** Inhibition rate of 40 compounds at 5 µg/ml from 2-5 and 2-8 2-D similarity search.

**Table S1.** Inhibition rates of analogs of **2-5** and **2-8** 2D similarity search (Part3).

| Compound | Structure                                                                         | Inhibition% |         |       |
|----------|-----------------------------------------------------------------------------------|-------------|---------|-------|
|          |                                                                                   | MDA-MB-231  | SUM-159 | MCF-7 |
| 3-21     | 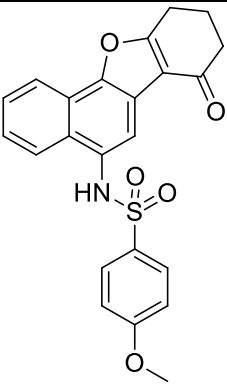 | 50.511      | 36.385  | 6.218 |
